# Supplementary material for: On the radical scavenging activity of isoflavones: thermodynamics of O–H bond cleavage
Source: Royal Society of Chemistry journal article supplement (doi:10.1039/c3cp00095h), 2013-01-01
Supplement: c3cp00095h.pdf [file c3cp00095h.pdf]

# On the radical scavenging activity of isoflavones: Thermodynamics of O–H bond cleavage

*(Electronic Supplementary Information)*

Jozef Lengyel,<sup>a,b\*</sup> Ján Rimarčík,<sup>c</sup> Adam Vagánek<sup>c</sup> and Erik Klein<sup>c\*</sup>

<sup>a</sup> *J. Heyrovský Institute of Physical Chemistry, v.v.i., Academy of Sciences of the Czech Republic, Dolejškova 3, CZ-182 23 Prague 8, Czech Republic. E-mail: jozef.lengyel@jh-inst.cas.cz*

<sup>b</sup> *Department of Physical Chemistry, Institute of Chemical Technology, Technická 5, CZ-166 28 Prague 6, Czech Republic*

<sup>c</sup> *Institute of Physical Chemistry and Chemical Physics, Slovak University of Technology in Bratislava, Radlinského 9, SK-812 37 Bratislava, Slovakia. E-mail: erik.klein@stuba.sk*

| Model molecule | Parent molecules                   | Structure of model molecule                                                         |
|----------------|------------------------------------|-------------------------------------------------------------------------------------|
| <b>I</b>       | daidzein<br>formononetin           | 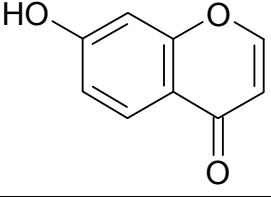   |
| <b>II</b>      | genistein<br>biochanin A<br>orobol |    |
| <b>III</b>     | prunetin<br>santal                 |    |
| <b>IV</b>      | 6-hydroxydaidzein                  |   |
| <b>V</b>       | glycitein                          |  |

Fig. 1S Model molecules without B ring.

Table 1S Published gas-phase reaction enthalpies in  $\text{kJ mol}^{-1}$ .

| Molecule                  | BDE        | IP  | PDE        | PA          | ETE        |
|---------------------------|------------|-----|------------|-------------|------------|
| daidzein <sup>a</sup>     |            | 733 |            |             |            |
| 4'-OH                     | <b>340</b> |     | <b>924</b> | 1419        | <b>239</b> |
| 7-OH                      | 359        |     | 943        | <b>1375</b> | 306        |
| formononetin <sup>a</sup> | 703        |     |            |             |            |
| 7-OH                      | 358        |     | 976        | 1377        | 303        |
| genistein <sup>a</sup>    |            | 724 |            |             |            |
| 4'-OH                     | <b>339</b> |     | <b>945</b> | 1411        | <b>252</b> |
| 5-OH                      | 378        |     | 983        | <b>1350</b> | 308        |
| 7-OH                      | 368        |     | 972        | 1373        | 316        |
| biochanin A <sup>a</sup>  | 705        |     |            |             |            |
| 5-OH                      | 383        |     | 1001       | <b>1369</b> | 336        |
| 7-OH                      | <b>367</b> |     | <b>985</b> | 1375        | <b>315</b> |
| prunetin <sup>b</sup>     |            | 708 |            |             |            |
| 4'-OH                     | <b>340</b> |     | <b>954</b> | <b>1411</b> | <b>251</b> |
| 5-OH                      | 469        |     | 1083       | 1450        | 340        |
| glycitein <sup>b</sup>    |            | 704 |            |             |            |
| 4'-OH                     | 338        |     | 956        | 1425        | <b>234</b> |
| 7-OH                      | <b>336</b> |     | <b>954</b> | <b>1373</b> | 285        |

a. J. Zhang, F. Du, B. Peng, R. Lu, H. Gao and Z. Zhou, *J. Mol. Struct. THEOCHEM*, 2010, **955**, 1–6.

b. K. Senthil kumar and R. Kumaresan, *Comp. Theor. Chem.*, 2012, **985**, 14–22.

Table 2S Gas-phase B3LYP/6-311+G\*\* reaction enthalpies in  $\text{kJ mol}^{-1}$  of model molecules of isoflavones without B ring.

| Model molecule | BDE | IP  | PDE | PA   | ETE |
|----------------|-----|-----|-----|------|-----|
| <b>I</b>       |     | 827 |     |      |     |
| 7-OH           | 360 |     | 855 | 1378 | 304 |
| <b>II</b>      |     | 792 |     |      |     |
| 5-OH           | 415 |     | 945 | 1452 | 285 |
| 7-OH           | 371 |     | 894 | 1376 | 316 |
| <b>III</b>     |     | 773 |     |      |     |
| 5-OH           | 412 |     | 961 | 1457 | 277 |
| <b>IV</b>      |     | 787 |     |      |     |
| 6-OH           | 321 |     | 855 | 1365 | 278 |
| 7-OH           | 327 |     | 862 | 1345 | 305 |
| <b>V</b>       |     | 767 |     |      |     |
| 7-OH           | 358 |     | 912 | 1398 | 282 |

Table 3S Parameters of 5-OH hydrogen bonds in isoflavones and corresponding model molecules. Bond lengths in Ångströms, angle in deg.

| Molecule         | Bond lengths   |                | Angle        |
|------------------|----------------|----------------|--------------|
|                  | O–H            | H···O          | O–H···O      |
| genistein        | 0.99296        | 1.68869        | 148.5        |
| biochanin A      | 0.99315        | 1.68752        | 148.6        |
| orobol           | 0.99347        | 1.68424        | 148.7        |
| model <b>II</b>  | <i>0.99273</i> | <i>1.70462</i> | <i>148.5</i> |
| santal           | 0.99296        | 1.68869        | 148.5        |
| prunetin         | 0.99276        | 1.69000        | 148.5        |
| model <b>III</b> | <i>0.99251</i> | <i>1.70588</i> | <i>148.6</i> |

Table 4S Published reaction enthalpies in  $\text{kJ mol}^{-1}$  in benzene and water.<sup>a</sup>

| Molecule            | BDE        | IP  | PDE        | PA         | ETE        |
|---------------------|------------|-----|------------|------------|------------|
| prunetin (benzene)  |            | 601 |            |            |            |
| 4'-OH               | <b>343</b> |     | <b>187</b> | <b>477</b> | <b>310</b> |
| 5-OH                | 438        |     | 283        | 505        | 380        |
| glycitein (benzene) |            | 599 |            |            |            |
| 4'-OH               | 341        |     | 187        | 485        | <b>301</b> |
| 7-OH                | 341        |     | 187        | <b>440</b> | 346        |
| prunetin (water)    |            | 436 |            |            |            |
| 4'-OH               | <b>353</b> |     | <b>65</b>  | <b>204</b> | <b>297</b> |
| 5-OH                | 387        |     | 150        | 206        | 380        |
| glycitein (water)   |            | 436 |            |            |            |
| 4'-OH               | <b>349</b> |     | <b>64</b>  | 207        | <b>293</b> |
| 7-OH                | 355        |     | 68         | <b>169</b> | 334        |

a. K. Senthil kumar and R. Kumaresan, *Comp. Theor. Chem.*, 2012, **985**, 14–22.
